# Supplementary material for: Warning Signals of Post-Exertional Malaise in Myalgic Encephalomyelitis/Chronic Fatigue Syndrome: A Retrospective Analysis of 197 Patients
Source: MDPI journal article supplement (doi:10.3390/jcm10112517), 2021-06-07
Supplement: s1 [file s1]

Table S1. Medication intake in patients having myalgic encephalomyelitis/chronic fatigue syndrome with comorbid reactional depression and/or fibromyalgia

|                                          | Patients with prodromal new or non-typical symptoms <sup>a</sup> | The rest of the study population | P     |
|------------------------------------------|------------------------------------------------------------------|----------------------------------|-------|
| Patients having reactional depression, n | 7                                                                | 64                               |       |
| Medication: Antidepressants, n (%)       | 1 (14.3)                                                         | 27 (42.2)                        | 0.23  |
| Anxiolytics, n (%)                       | 3 (42.9)                                                         | 19 (29.7)                        | 0.67  |
| Neuroleptics, n (%)                      | 0 (0)                                                            | 4 (6.3)                          | >0.99 |
| Analgesics, n (%)                        | 0 (0)                                                            | 4 (6.3)                          | >0.99 |
| Patients having fibromyalgia, n          | 2                                                                | 30                               |       |
| Medication: Antidepressants, n (%)       | 0 (0)                                                            | 11 (36.7)                        | 0.53  |
| Anxiolytics, n (%)                       | 0 (0)                                                            | 10 (33.3)                        | >0.99 |
| Neuroleptics, n (%)                      | 0 (0)                                                            | 0 (0)                            | >0.99 |
| Analgesics, n (%)                        | 0 (0)                                                            | 7 (23.3)                         | >0.99 |

<sup>a</sup>Symptoms occurring after exposure to a stressor and before onset of baseline symptom exacerbation

Table 2. Association between types of stressors and prodromal new or non-typical symptoms

|                      | Prodromal new or non-typical symptoms |         |            |             |                    |        |             |          |         |               |                   |                |                  |                     |        |
|----------------------|---------------------------------------|---------|------------|-------------|--------------------|--------|-------------|----------|---------|---------------|-------------------|----------------|------------------|---------------------|--------|
|                      | Headaches                             | Myalgia | Arthralgia | Paresthesia | Motor disturbances | Nausea | Palpitation | Collapse | Vertigo | Mood disorder | Flu-like symptoms | Abdominal pain | Cold extremities | Shortness of breath | Rash   |
| <b>Stressor type</b> |                                       |         |            |             |                    |        |             |          |         |               |                   |                |                  |                     |        |
| Physical             | > 0.99                                | > 0.99  | > 0.99     | > 0.99      | > 0.99             | 0.30   | > 0.99      | > 0.99   | > 0.99  | > 0.99        | > 0.99            | > 0.99         | > 0.99           | > 0.99              | > 0.99 |
| Cognitive            | > 0.99                                | > 0.99  | 0.33       | > 0.99      | > 0.99             | 0.38   | > 0.99      | 0.25     | > 0.99  | 0.09          | > 0.99            | > 0.99         | 0.33             | 0.25                | 0.54   |
| Emotional            | 0.35                                  | 0.50    | > 0.99     | > 0.99      | > 0.99             | 0.68   | > 0.99      | 0.55     | > 0.99  | > 0.99        | > 0.99            | > 0.99         | 0.41             | > 0.99              | 0.50   |
| Infection            | 0.32                                  | 0.51    | 0.3        | > 0.99      | 0.51               | > 0.99 | > 0.99      | 0.53     | > 0.99  | 0.42          | > 0.99            | 0.3            | > 0.99           | > 0.99              | > 0.99 |
| Orthostatism         | 0.59                                  | 0.4     | > 0.99     | 0.59        | 0.4                | > 0.99 | 0.4         | 0.55     | > 0.99  | > 0.99        | > 0.99            | > 0.99         | 0.22             | 0.55                | > 0.99 |
| Noise                | > 0.99                                | > 0.99  | > 0.99     | 0.4         | > 0.99             | 0.51   | > 0.99      | > 0.99   | > 0.99  | 0.52          | > 0.99            | > 0.99         | > 0.99           | > 0.99              | > 0.99 |
| Menses               | 0.06                                  | > 0.99  | > 0.99     | > 0.99      | 0.34               | 0.62   | > 0.99      | > 0.99   | > 0.99  | 0.33          | > 0.99            | 0.19           | > 0.99           | 0.47                | > 0.99 |
| Food                 | > 0.99                                | > 0.99  | > 0.99     | > 0.99      | > 0.99             | > 0.99 | > 0.99      | > 0.99   | > 0.99  | 0.37          | > 0.99            | > 0.99         | > 0.99           | > 0.99              | > 0.99 |
| Chemicals            | > 0.99                                | > 0.99  | > 0.99     | > 0.99      | > 0.99             | > 0.99 | > 0.99      | > 0.99   | > 0.99  | 0.37          | > 0.99            | > 0.99         | > 0.99           | > 0.99              | > 0.99 |
| Humidity             | 0.22                                  | > 0.99  | > 0.99     | > 0.99      | > 0.99             | > 0.99 | > 0.99      | > 0.99   | > 0.99  | > 0.99        | > 0.99            | > 0.99         | > 0.99           | 0.11                | > 0.99 |

The values in the table referred to the p-values according to Fisher's test
