# Supplementary material for: Warning Signals of Post-Exertional Malaise in Myalgic Encephalomyelitis/Chronic Fatigue Syndrome: A Retrospective Analysis of 197 Patients
Source: MDPI journal article supplement (doi:10.3390/jcm10112517), 2021-06-07
Supplement: s1 [file s1]

Figure S1: Assessment of Post-Exertion Malaise in patients with Myalgic Encephalomyelitis / Chronic Fatigue Syndrome

ANGERS UNIVERSITY HOSPITAL - INTERNAL MEDICINE DEPARTMENT

PATIENT: NAME ..... FIRST NAME ..... DATE OF BIRTH .... /.... /.....

ASSESSMENT DATE: .... /.... /.....

## MPE ASSESSMENT

### A. MPE FEATURES

#### A.1 MPE Stressors:

**Q: What makes your symptoms worse?**

Physical exertion: ☐

Cognitive exertion: ☐

Emotional stress: ☐

Orthostatism: ☐

Other stressors: .....  
.....

#### A.2 Timing of onset of symptom exacerbation after stressor:

**Q: After a stressor, your symptoms get worse?**

Immediately <1h: ☐

Delayed: ☐ 1-3h ☐ 3-6h ☐ 6-12h

☐ 12-24h ☐ >24h

Both: ☐

#### A.3 MPE manifestations:

##### A.3a Exacerbation of baseline ME/CFS symptoms:

**Q: Please describe your symptoms that get worse after stressor**

Physical fatigue: ☐

Cognitive difficulties: ☐

Brain fog: ☐

Unrefreshing sleep: ☐

Flu-like symptoms: ☐

Sore throat: ☐

Myalgia: ☐

Arthralgia: ☐

Nausea: ☐

Mood disorders: ☐

Headache: ☐

Neurological: ☐

Other symptoms: .....

**A.3b Emergence of new or non-typical symptoms** (different from habitual baseline symptoms):

**Q: Do you develop new symptoms different from that you usually experience?**

☐ Yes      ☐ No

**Q: If yes, please describe these symptoms**

.....  
.....

**Q: If yes, when do these new or non-typical symptoms appear?**

- ☐ Before onset of baseline symptom exacerbation
- ☐ Concomitant with baseline symptom exacerbation
- ☐ After baseline symptom exacerbation

**A.4 PEM duration (recovery time):**

**Q: How long does baseline symptom exacerbation last?**

- ☐ 24h
- ☐ 1-3 days
- ☐ 3-7 days
- ☐ > 1week
- ☐ > 1month

**A.5 MPE perception:**

**Q: How do you feel about your experience of PEM?** (in the patient's own words)

.....

## **B. MPE SEVERITY** (CDC SI, Wagner et al. 2005)

**B.1 MPE frequency:**

**Q: During the past month, how often have you had unusual fatigue after exertion?**

- ☐ A little of the time
- ☐ Some of the time
- ☐ Most of the time
- ☐ All of the time

**B.2 MPE intensity:**

**Q: During the past month, how bad was your unusual fatigue after exertion?**

- ☐ Mild
- ☐ Moderate
- ☐ Severe

**B.3 MPE Severity Score:** .....
